# Supplementary material for: Highly efficient, coking-resistant SOFCs for energy conversion using biogas fuels
Source: Royal Society of Chemistry journal article supplement (doi:10.1039/c5ta06421j), 2015-01-01
Supplement: c5ta06421j1.pdf [file c5ta06421j1.pdf]

## Supplementary Information

### Highly Efficient, Coking-Resistant SOFCs for Energy Conversion Using Biogas Fuels

Jianjun Ma<sup>†</sup>, Cairong Jiang<sup>†</sup>, Paul A. Connor, Mark Cassidy and John T. S. Irvine\*

School of Chemistry, University of St Andrews, The Purdie Building, St  
Andrews, Fife, Scotland, UK KY16 9ST.

E-mail: [jtsi@st-andrews.ac.uk](mailto:jtsi@st-andrews.ac.uk);  
Tel: +44 1334 463817; Fax: +44 1334 463808

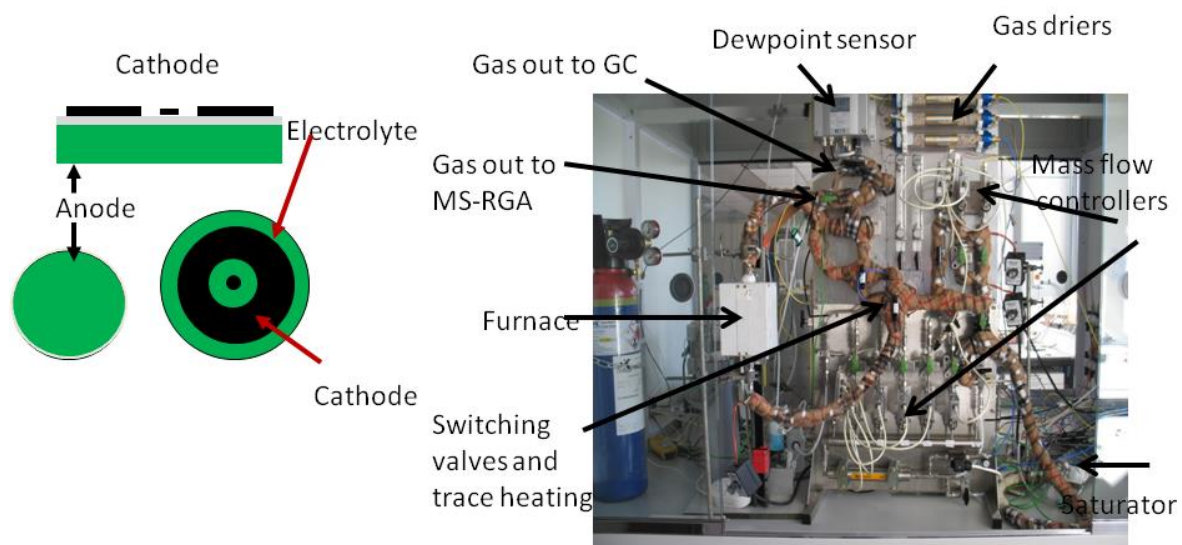

Fig. S1. Schematic diagram of the cell structure and test rig

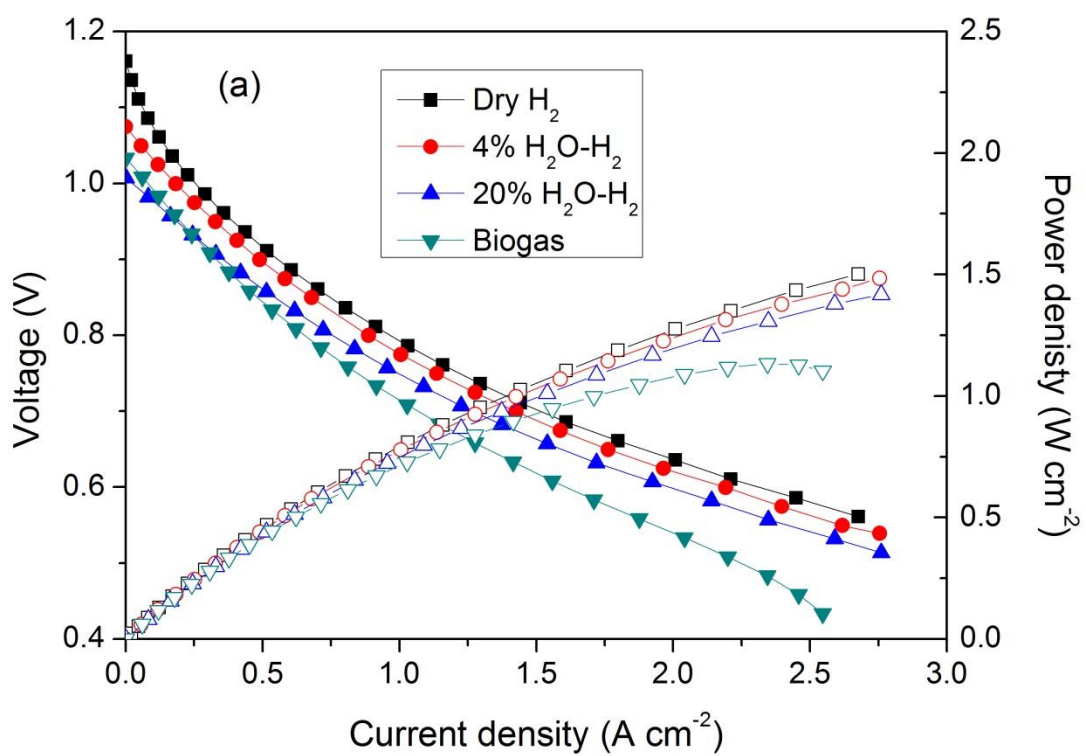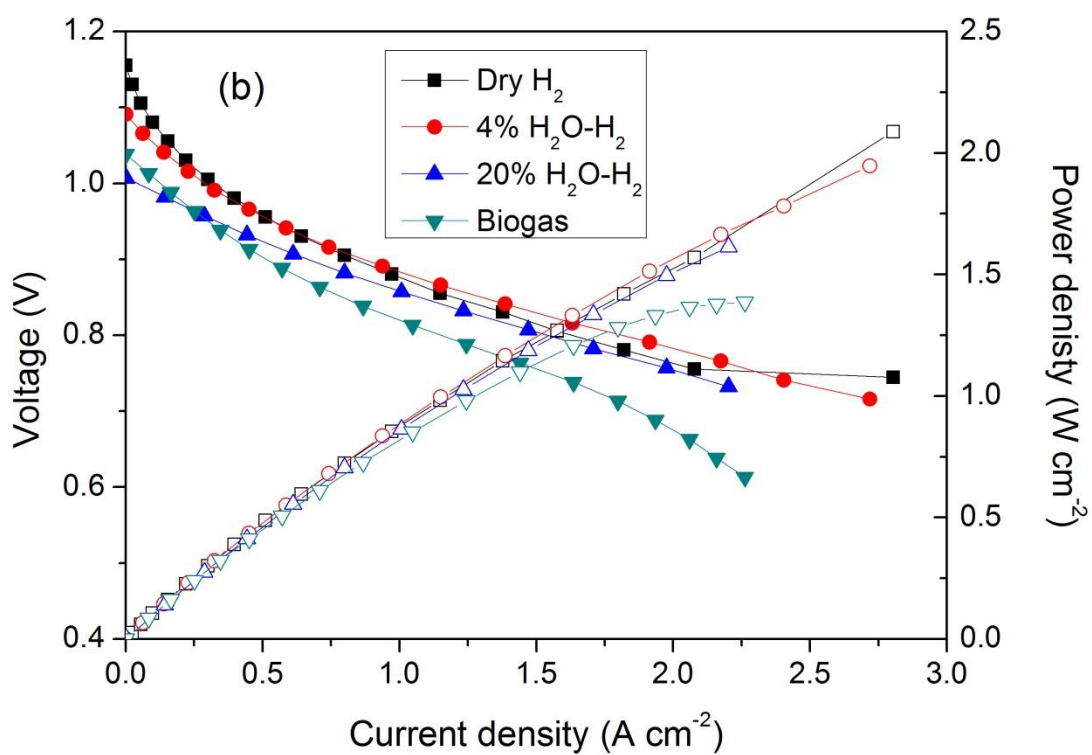

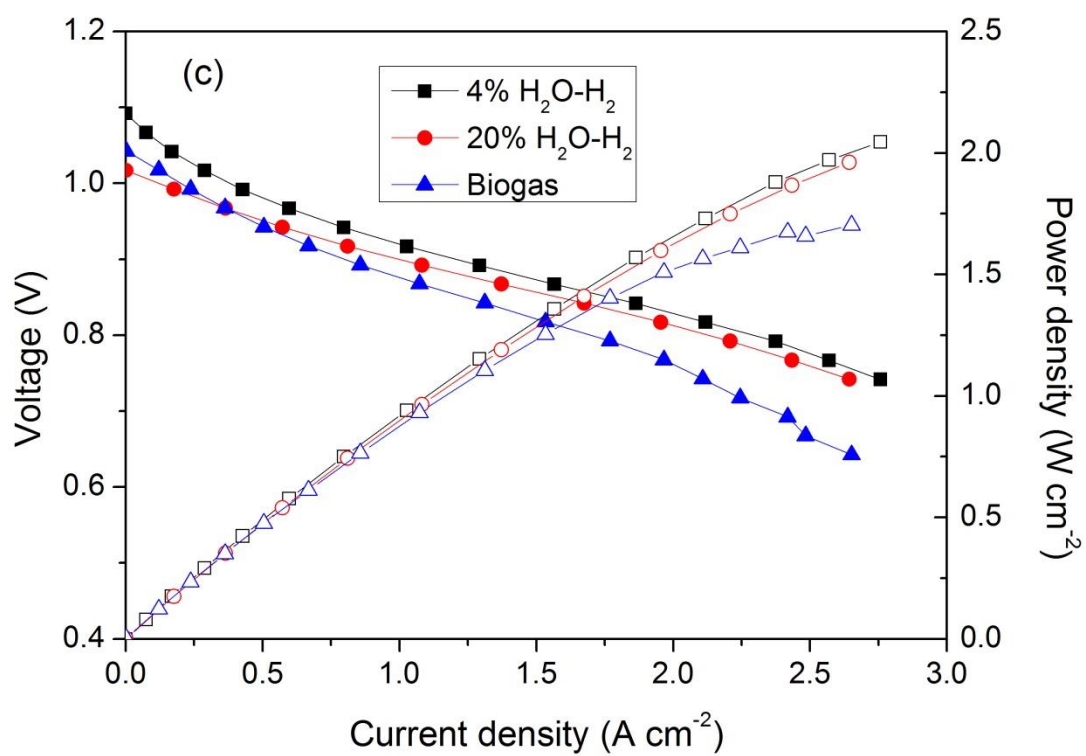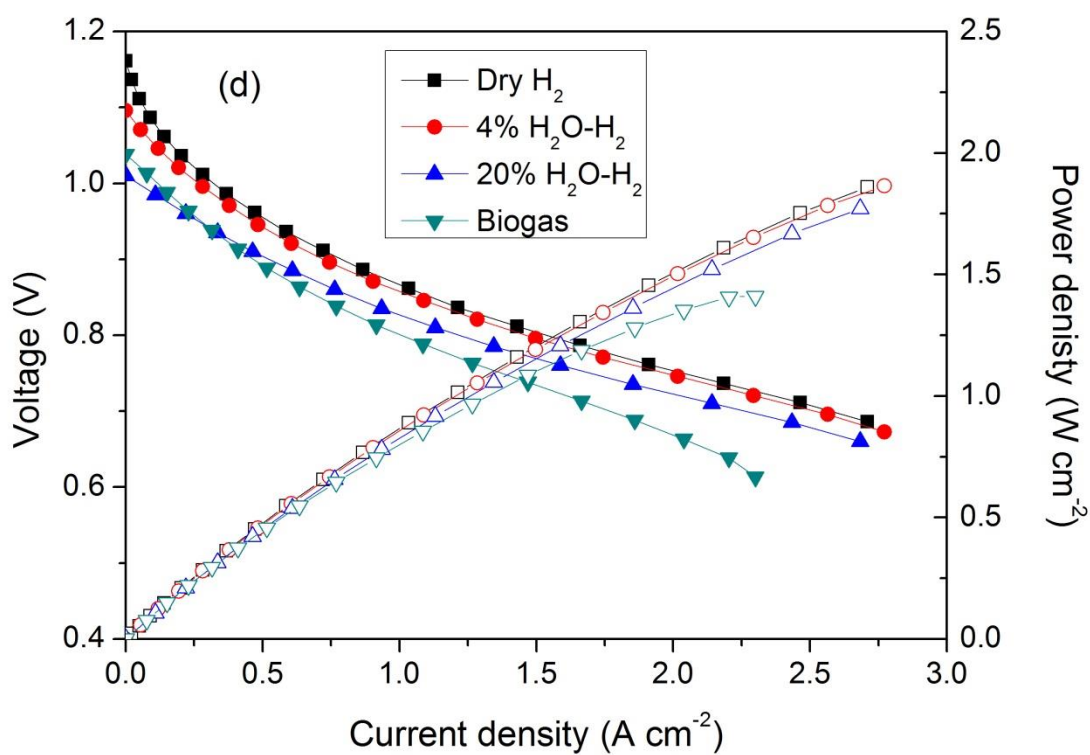

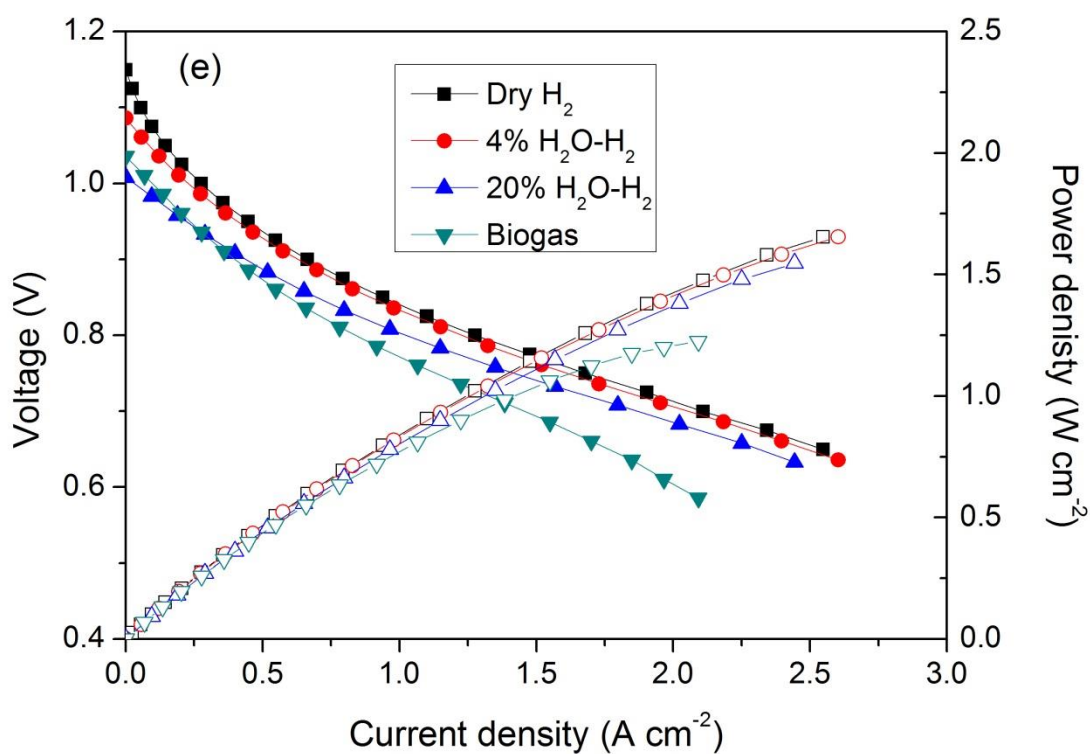

Fig. S2. The cell performance of an anode-supported cell in pure hydrogen, 4% $\text{H}_2\text{O}$ -hydrogen, 20% $\text{H}_2\text{O}$ -hydrogen and the recirculated biogas at 800 °C; the cell was composed of a YSZ thin film electrolyte, a LSM-YSZ composite cathode and a 1 mm Ni-YSZ infiltrated with different amounts of BCZYYb (a) BCZYYb-0; (b) BCZYYb-0.3 wt%; (c) BCZYYb-0.6 wt%; (d) BCZYYb-1.0 wt%; (e) BCZYYb-1.6 wt%

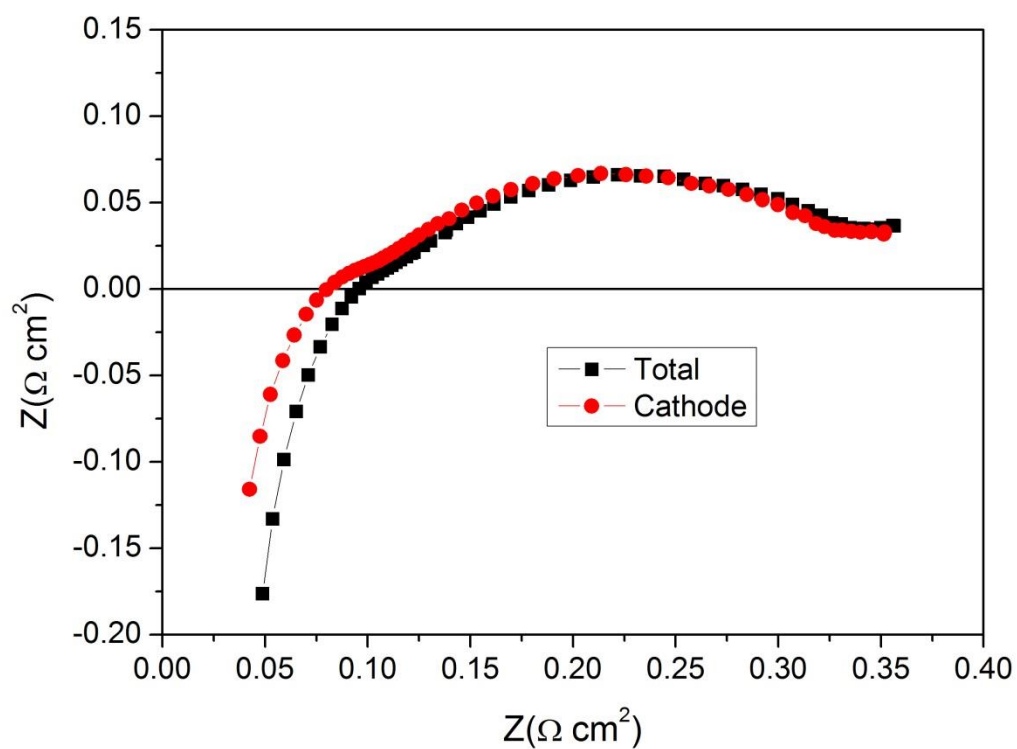

Fig. S3. Impedance spectra of the cell and the cathode, the cell has a structure of BCZYYb-0.6 wt% -Ni-YSZ/YSZ/GDC/LSCF-GDC, and the cathode impedance spectra was tested with three electrode mode shown in Fig. S1.

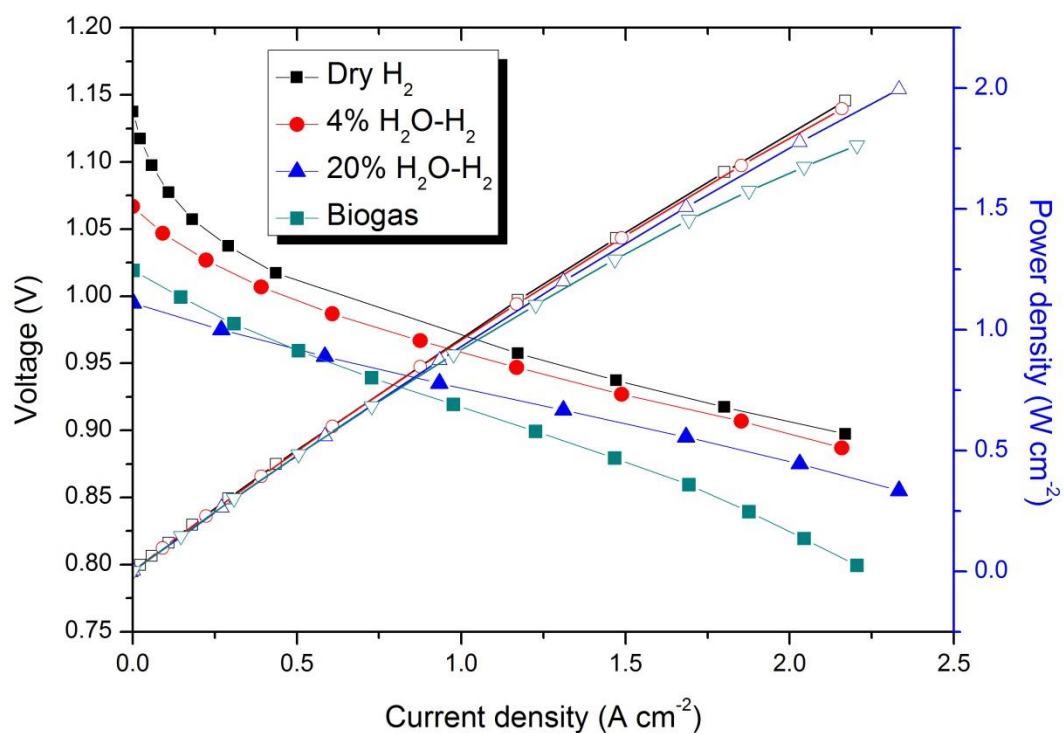

Fig. S4. The cell performance of an anode-supported cell in pure hydrogen, 4% $\text{H}_2\text{O}$ -hydrogen, 20% $\text{H}_2\text{O}$ -hydrogen and the recirculated biogas at 850 °C. The cell was composed of a BCZYYb-0.6 wt%-1 mm Ni-YSZ, a 3  $\mu\text{m}$  YSZ electrolyte, a GDC buffer layer and a LSCF-GDC.

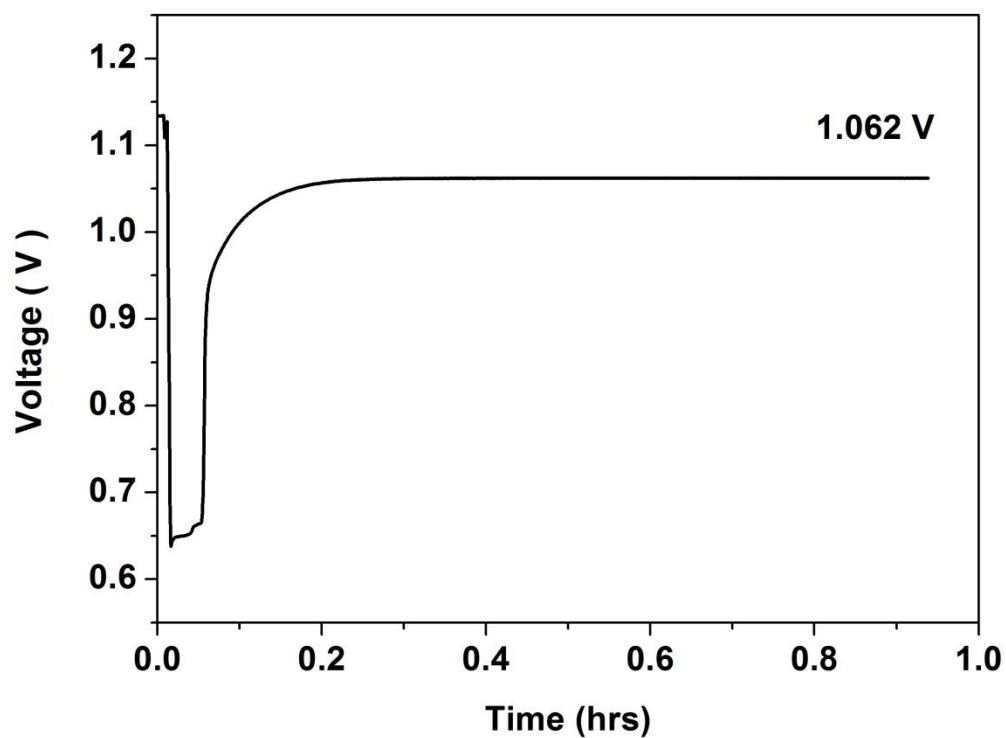

Fig. S5. The open circuit voltage of an anode-supported cell of a 1 mm Ni-YSZ, a YSZ thin film electrolyte, a GDC buffer layer and a LSCF-GDC, operating in pure hydrogen to 4% $\text{H}_2\text{O}$ -hydrogen (room temperature 25 °C). The OCV of the cell in hydrogen was 1.13 V and decreased 0.65 V during the switchover to 4% $\text{H}_2\text{O}$ -hydrogen and then became to be stable in 1.06 V in one hour.



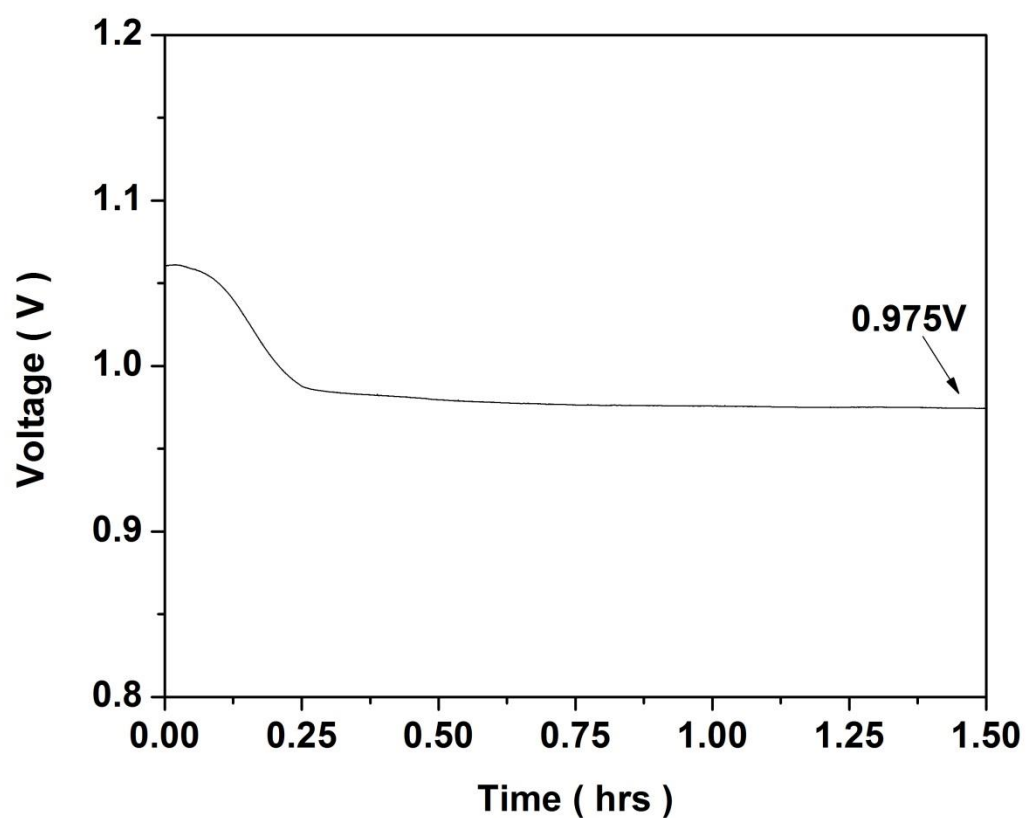

Fig. S6. The open circuit voltage of an anode-supported cell of a 1 mm Ni-YSZ, a YSZ thin film electrolyte, a GDC buffer layer and a LSCF-GDC, operating in 4% $\text{H}_2\text{O}$ -hydrogen to 20%  $\text{H}_2\text{O}$ -hydrogen, the OCV of the cell was 1.06 V in 4% $\text{H}_2\text{O}$ -hydrogen and started to decrease in 20%  $\text{H}_2\text{O}$ -hydrogen and stabilised at 0.975 V.

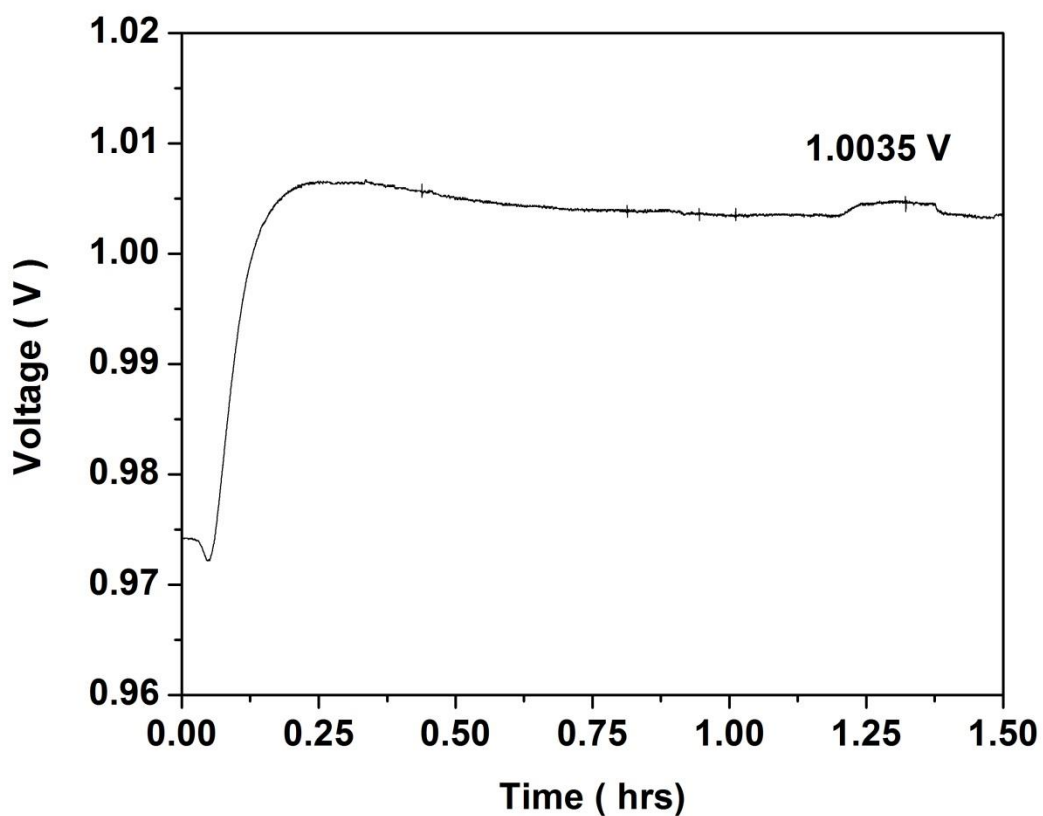

Fig. S7. The open circuit voltage of an anode-supported cell of a 1 mm Ni-YSZ, a YSZ thin film electrolyte, a GDC buffer layer and a LSCF-GDC, operating in 20% H<sub>2</sub>O-hydrogen, changes to the recirculated biogas, the OCV of the cell in 20% H<sub>2</sub>O-hydrogen was 0.975 V increased to 1.00 V.

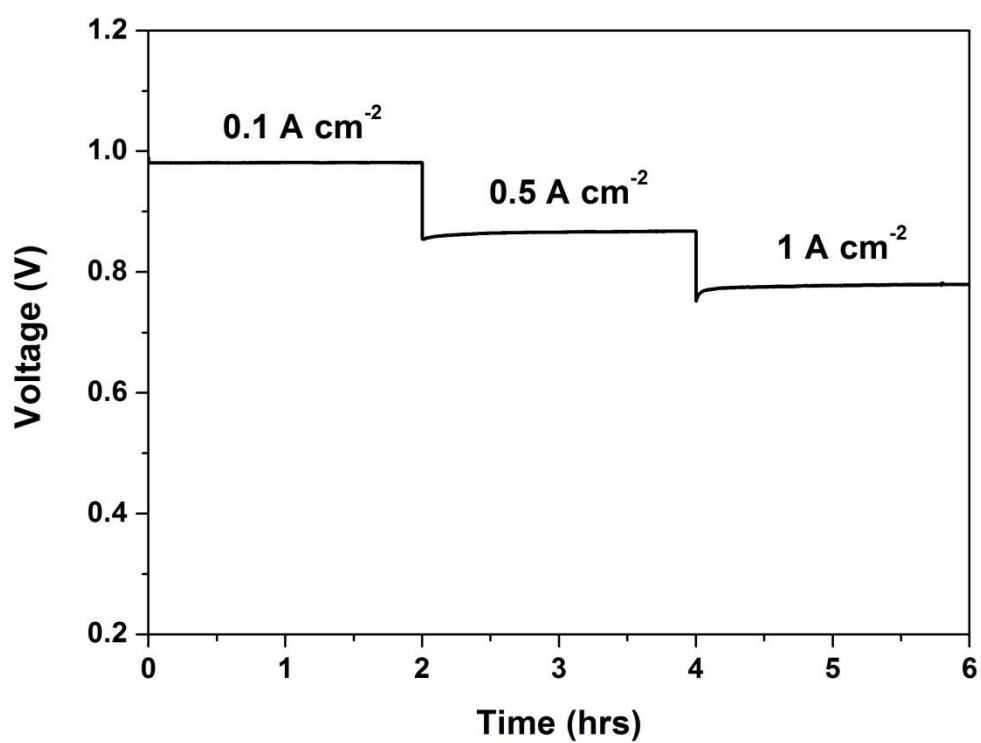

Fig. S8. Cell voltage at different currents ( $0.1 \text{ A cm}^{-2}$ ,  $0.5 \text{ A cm}^{-2}$  and  $1 \text{ A cm}^{-2}$ ) supplied with  $20 \text{ ml min}^{-1}$  biogas, testing temperature was  $850^\circ\text{C}$ , the cell was composed of a 1 mm Ni-YSZ, a YSZ thin film electrolyte, a LSM-YSZ composite cathode.
